# Supplementary material for: A novel catalytic two-step process for the preparation of rigid polyurethane foams: synthesis, mechanism and computational studies
Source: Royal Society of Chemistry journal article supplement (doi:10.1039/d1re00102g), 2021-01-01
Supplement: d1re00102g1.pdf [file d1re00102g1.pdf]

## Electronic Supplementary Information

### **Novel Catalytic Two-Step Process for Preparation of Rigid Polyurethane Foams: Synthesis, Mechanism and Theoretical Studies.**

Loredana Maiuolo,<sup>\*a</sup> Fabrizio Olivito,<sup>\*a</sup> Fortuna Ponte,<sup>\*a</sup> Vincenzo Algieri,<sup>a</sup> Matteo Antonio Tallarida,<sup>a</sup> Antonio Tursi,<sup>a</sup> Giuseppe Chidichimo,<sup>a</sup> Emilia Sicilia,<sup>a</sup> Antonio De Nino<sup>a</sup>

<sup>a</sup> Dipartimento di Chimica e Tecnologie Chimiche, Università della Calabria, 87036, Rende (CS), Italy.

Corresponding authors: *E-mail address* [maiuolo@unical.it](mailto:maiuolo@unical.it) (L. Maiuolo); [fabrizio.olivito@unical.it](mailto:fabrizio.olivito@unical.it) (F. Olivito); [fortuna.ponte@unical.it](mailto:fortuna.ponte@unical.it) (F. Ponte).

## Table of Contents

|           |                                                                                 |            |
|-----------|---------------------------------------------------------------------------------|------------|
| <b>1.</b> | <b>Reagents</b>                                                                 | <b>S3</b>  |
| <b>2.</b> | <b>Catalysts</b>                                                                | <b>S4</b>  |
| <b>3.</b> | <b>FT-IR spectra of the reagents (1-4) and the relative prepolymers (7-9)</b>   | <b>S5</b>  |
| <b>4.</b> | <b>FT-IR spectra of polyurethanes extended with 1,2-ethylene glycol (10-12)</b> | <b>S12</b> |
| <b>5.</b> | <b>FT-IR spectra of polyurethanes extended with 1,4-butanediol (13-15)</b>      | <b>S15</b> |

## 1. Reagents

### **Polyethylene glycol PEG 400 (Thermo Fisher Scientific)**

Molecular formula:  $\text{H}(\text{OCH}_2\text{CH}_2)_n\text{OH}$ ,  $n = 8-9$  (average)

Appearance (Color): Clear colorless

Form: Viscous liquid

Identification (FTIR): Conforms

Molecular Weight: Average mol weight 380-420 (based on OH value)

Hydroxyl Value: 267- 295 mg KOH/g

pH: 4.5-7.0 (10%, demin water)

Viscosity: 104-140 mPa·s at 20°C

### **Isophorone diisocyanate IPDI (EVONIK INDUSTRIES, Code: VESTANAT<sup>®</sup>IPDI)**

Molecular formula:  $\text{C}_{12}\text{H}_{18}\text{N}_2\text{O}_2$

Appearance (Color): Clear colorless

Form: liquid

Identification (FTIR): Conforms

Molecular Weight: 222.3 g/mol

NCO content: 37.5- 37.8 %

Viscosity: 14 mPa·s at 20°C

Density: 1.058 g/ml

### **4,4'-methylenedicyclohexyl diisocyanate H<sub>12</sub>MDI (EVONIK INDUSTRIES, Code: VESTANAT<sup>®</sup>H<sub>12</sub>MDI)**

Molecular formula:  $\text{C}_{15}\text{H}_{22}\text{N}_2\text{O}_2$

Appearance (Colour): Clear colourless

Form: liquid

Identification (FTIR): Conforms

Molecular Weight: 262.35 g/mol

NCO content: 31.8- 32 %

Viscosity: 35 mPa·s at 20°C

Density: 1.07 g/ml

### **2,2,4-Trimethylhexamethylene diisocyanate TMDI (EVONIK INDUSTRIES, Code: VESTANAT<sup>®</sup>TMDI)**

Molecular formula:  $\text{C}_{11}\text{H}_{18}\text{N}_2\text{O}_2$

Appearance (Colour): Clear colourless

Form: liquid

Identification (FTIR): Conforms

Molecular Weight: 210.27 g/mol

NCO content: 39.7- 40 %

Viscosity: 5-8 mPa·s at 20°C

Density: 1.01 g/ml

## 2. Catalysts

Sodium Chloride NaCl (Sigma Aldrich, 99%)

Sodium bromide NaBr (Sigma Aldrich, 99.9%)

Sodium iodide NaI (Sigma Aldrich, 99.9%)

Sodium acetate NaOAc (Sigma Aldrich, 99%)

Sodium sulphate Na<sub>2</sub>SO<sub>4</sub> (Sigma Aldrich, Anhydrous, 99%)

Magnesium Chloride MgCl<sub>2</sub> (Sigma Aldrich, 98%)

Magnesium Sulphate MgSO<sub>4</sub> (Sigma Aldrich, 99.5%)

Calcium chloride CaCl<sub>2</sub> (Sigma Aldrich, 99.9%)

Calcium sulphate CaSO<sub>4</sub> (Sigma Aldrich, 99.9%)

### 3. FT-IR spectra of the reagents and the relative prepolymers

#### FT-IR spectrum of 4,4'-methylenedicyclohexyl diisocyanate H<sub>12</sub>MDI (1)

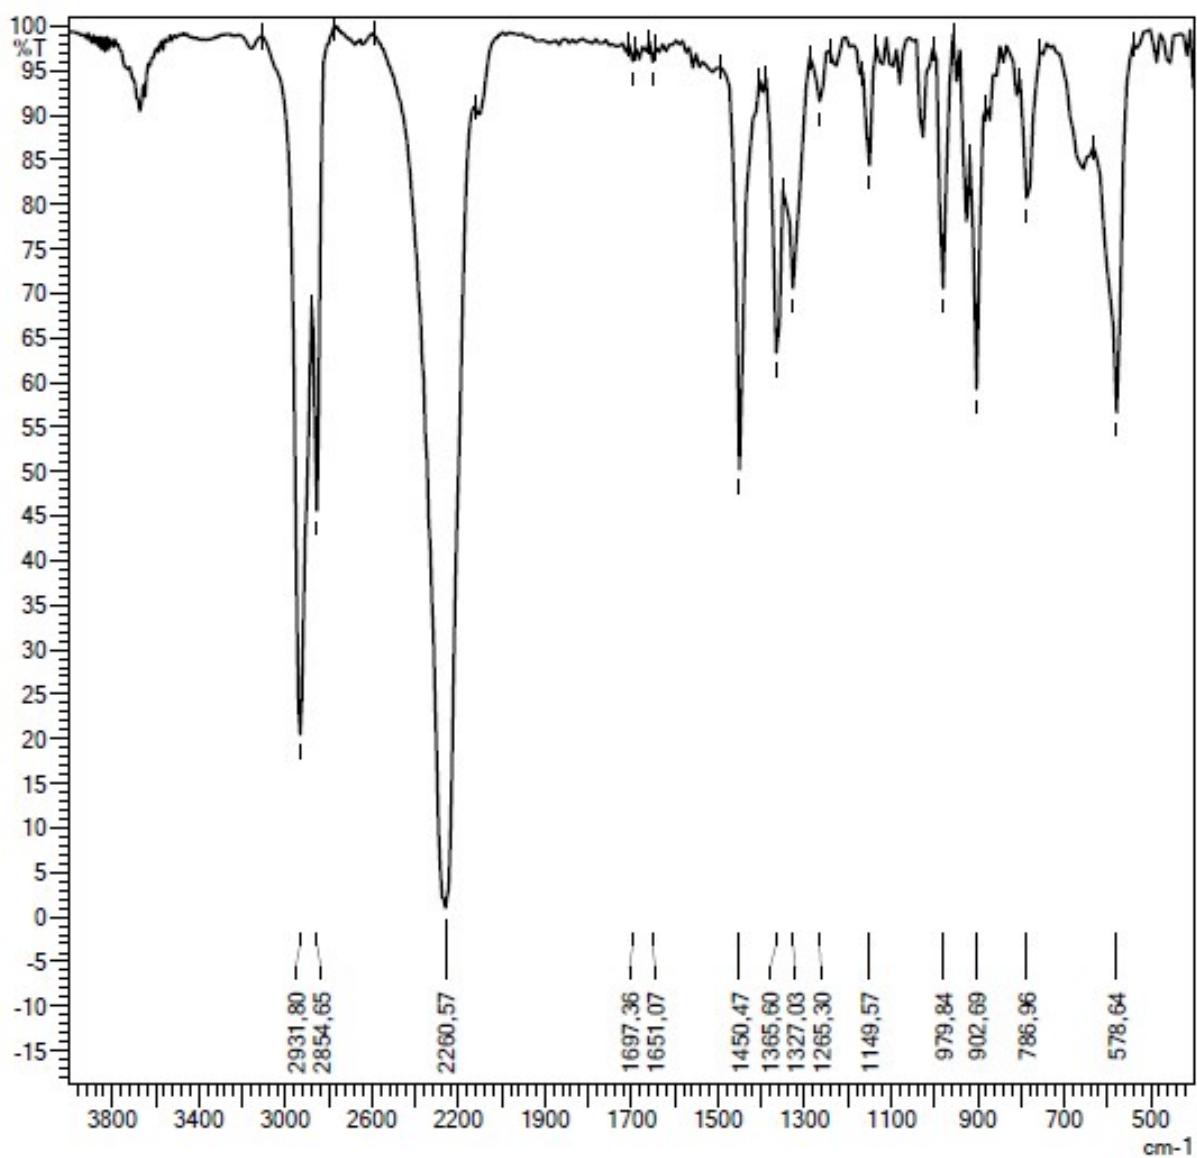

| Group (stretching) | Absorption peak (cm <sup>-1</sup> ) |
|--------------------|-------------------------------------|
| Aliphatic C-H      | 2854-2931                           |
| N=C=O              | 2260                                |

## FT-IR spectrum of isophorone diisocyanate IPDI (2)

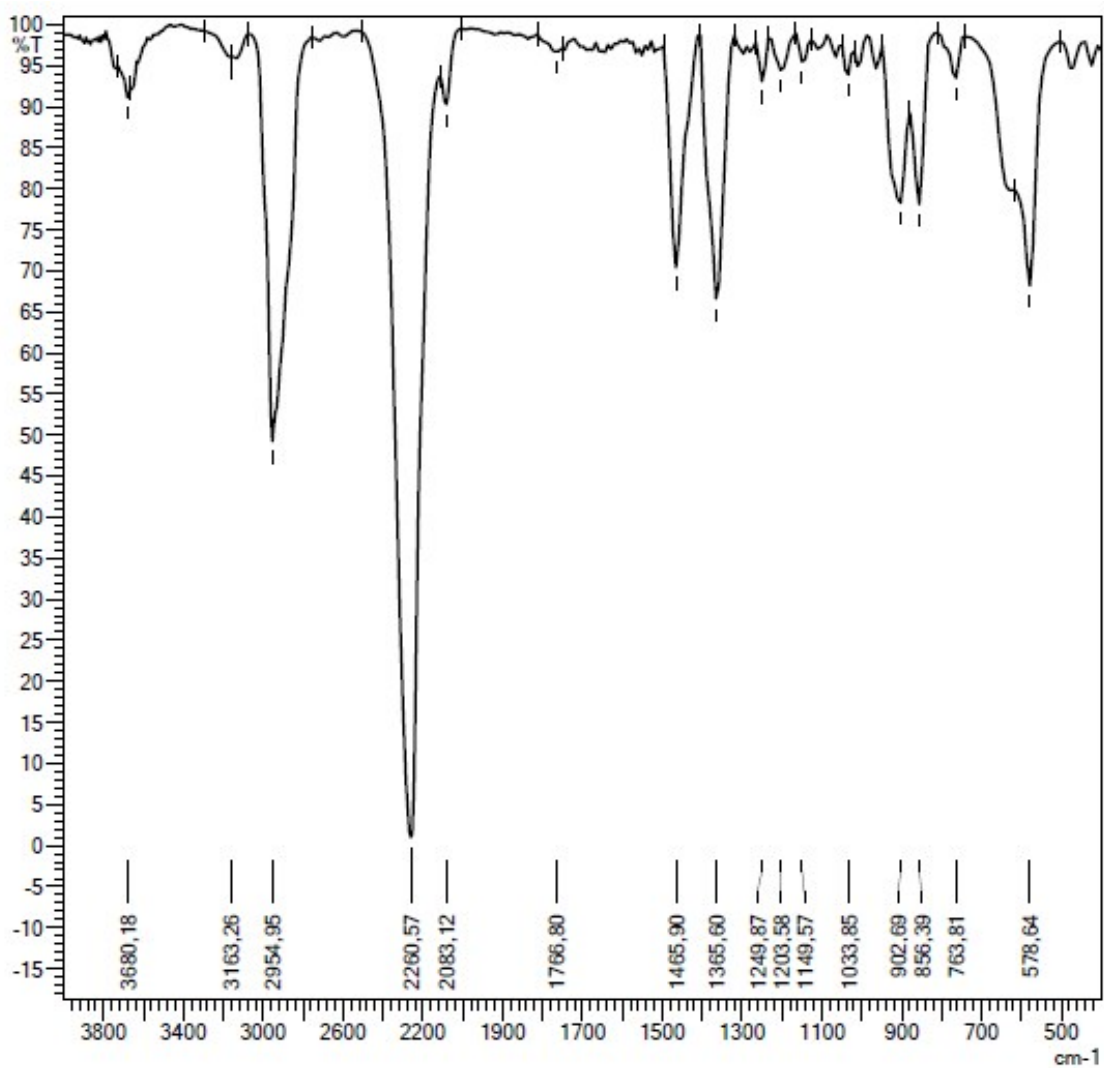

| Group (stretching) | Absorption peak (cm <sup>-1</sup> ) |
|--------------------|-------------------------------------|
| Aliphatic C-H      | 2954                                |
| N=C=O              | 2260                                |

### FT-IR spectrum of 2,2,4-trimethylhexamethylene diisocyanate TMDI (3)

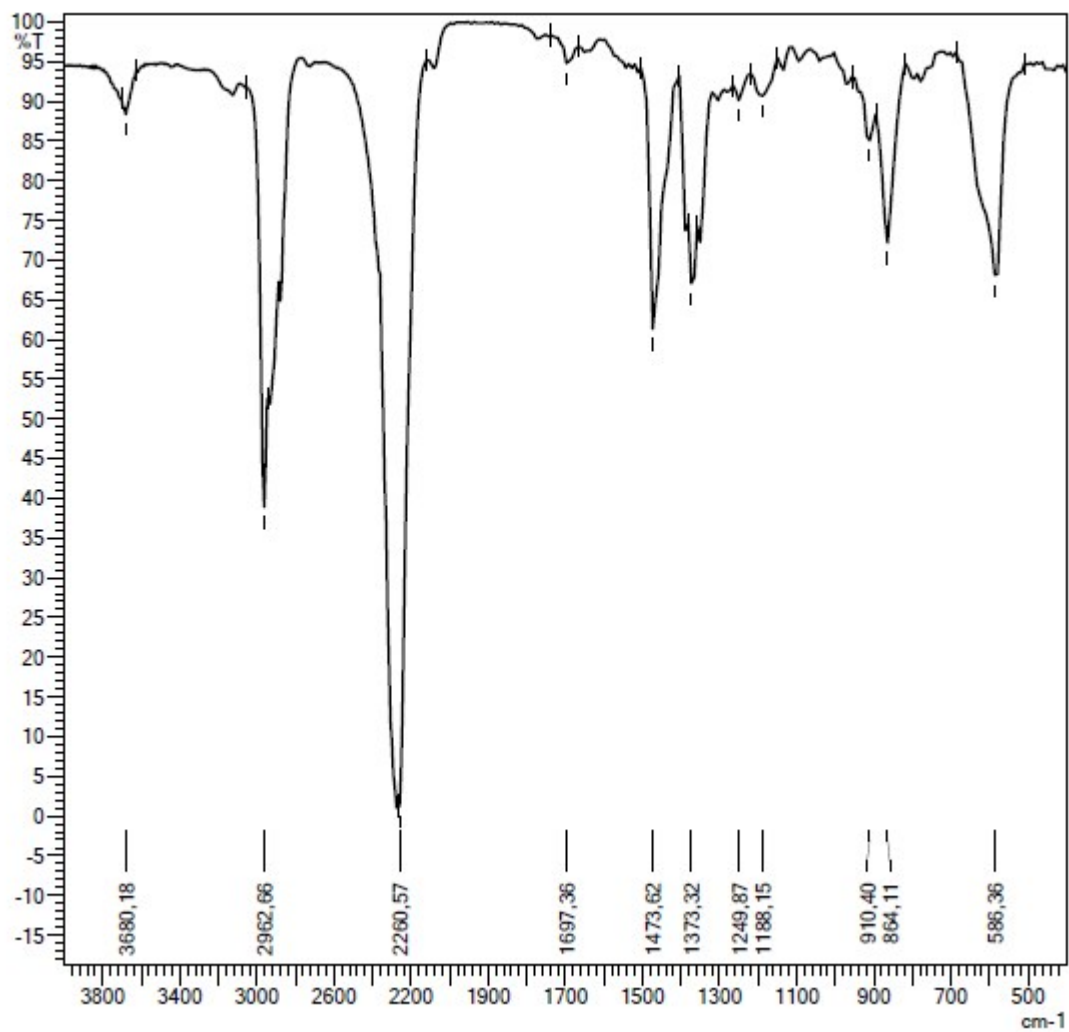

| Group (stretching) | Absorption peak (cm <sup>-1</sup> ) |
|--------------------|-------------------------------------|
| Aliphatic C-H      | 2962                                |
| N=C=O              | 2260                                |

### FT-IR spectrum of PEG 400 (4)

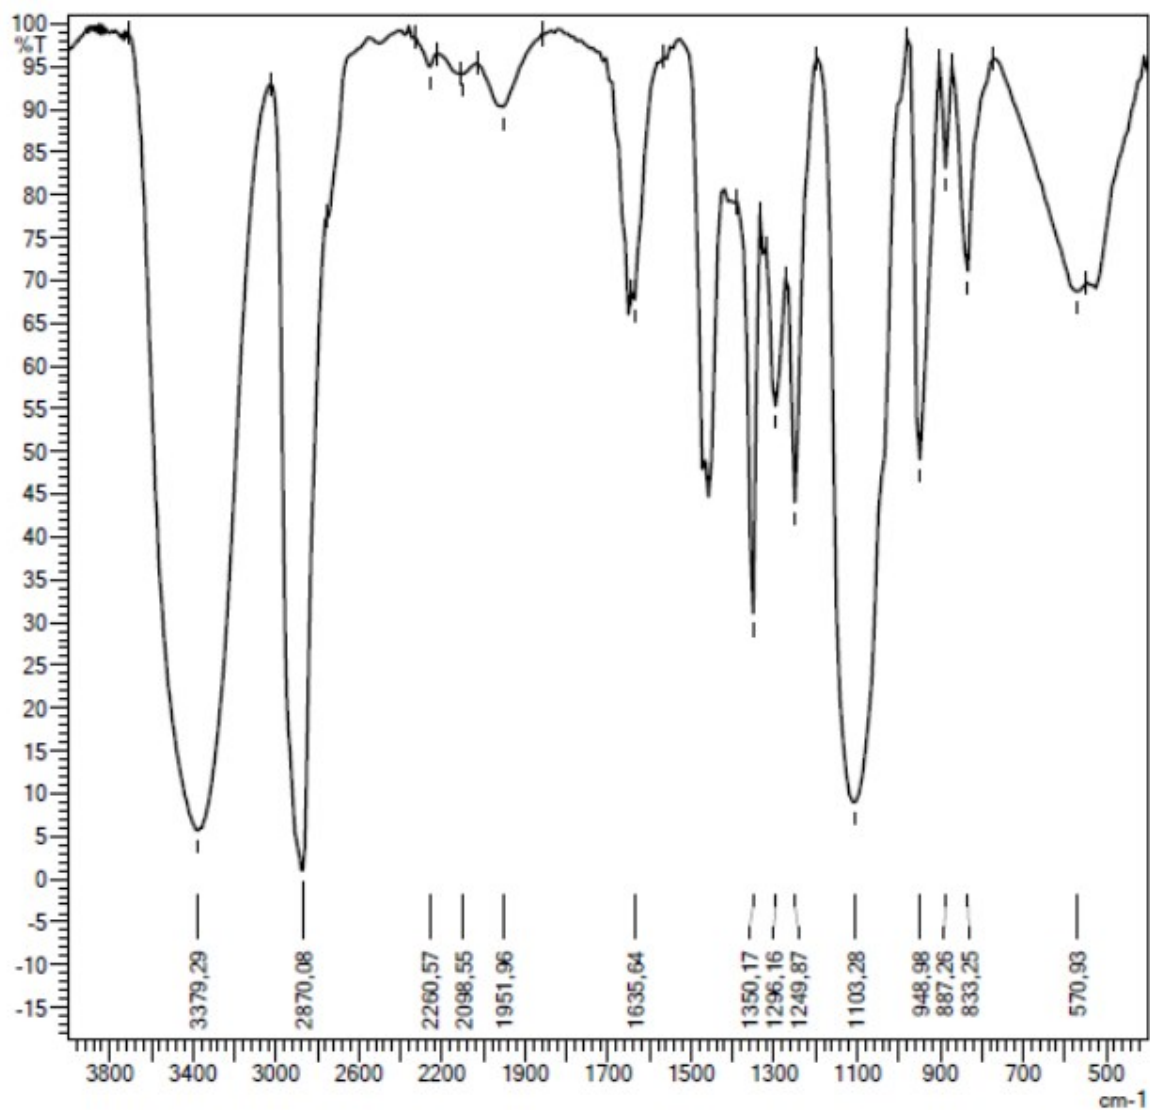

| Group (stretching) | Absorption peak (cm <sup>-1</sup> ) |
|--------------------|-------------------------------------|
| O-H                | 3379                                |
| Aliphatic C-H      | 2870                                |
| C-O-C and C-O-H    | 1103                                |



## FT-IR spectrum of the prepolymer 7

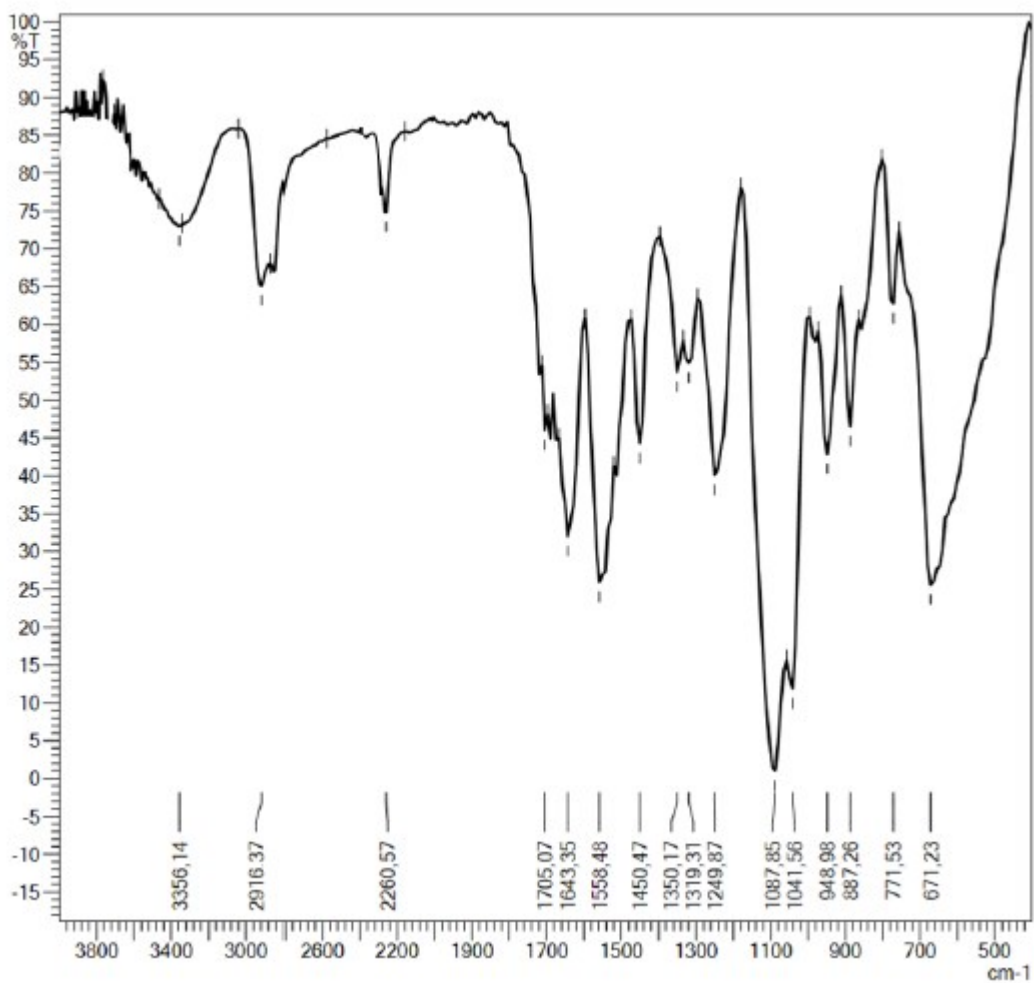

| Group (stretching) | Absorption peak (cm <sup>-1</sup> ) |
|--------------------|-------------------------------------|
| N-H                | 3356                                |
| Aliphatic C-H      | 2916                                |
| N=C=O              | 2260                                |
| C=O (urethane)     | 1705                                |
| C=O (urea)         | 1643                                |
| CO-NH              | 1558                                |
| C-O                | 1249                                |
| C-O-C              | 1087                                |

## FT-IR spectrum of the prepolymer 8

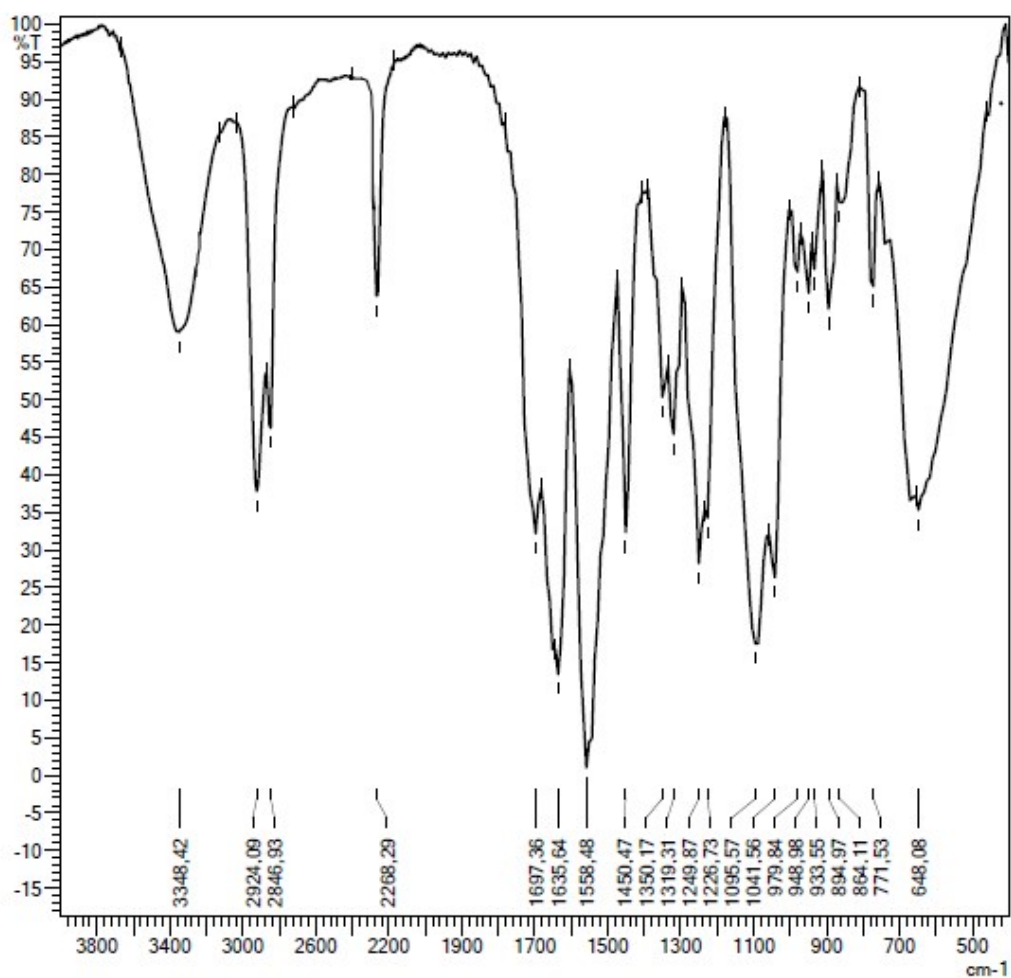

| Group (stretching) | Absorption peak (cm <sup>-1</sup> ) |
|--------------------|-------------------------------------|
| N-H                | 3348                                |
| Aliphatic C-H      | 2864-2924                           |
| N=C=O              | 2268                                |
| C=O (urethane)     | 1697                                |
| C=O (urea)         | 1635                                |
| CO-NH              | 1558                                |
| C-O                | 1249                                |
| C-O-C              | 1095                                |

## FT-IR spectrum of the prepolymer 9

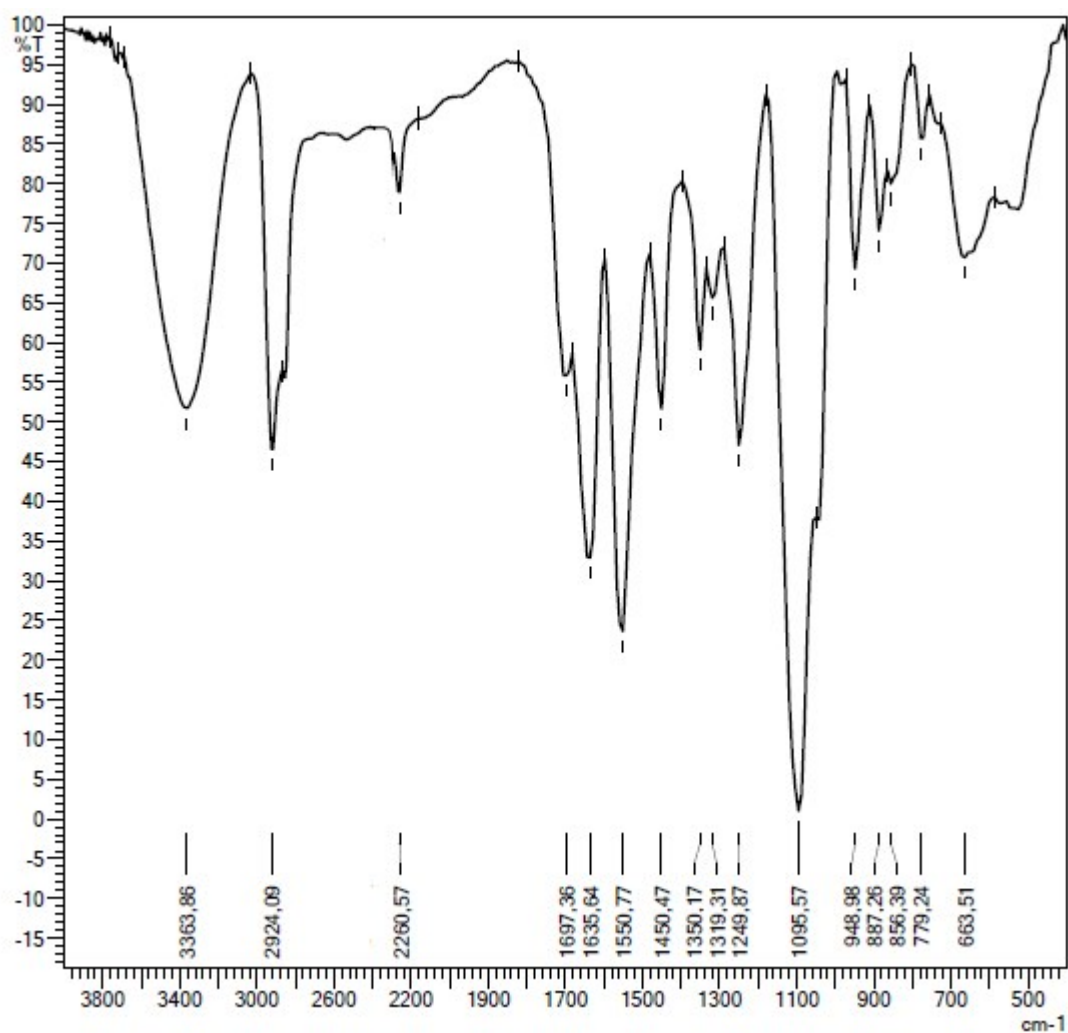

| Group (stretching) | Absorption peak (cm <sup>-1</sup> ) |
|--------------------|-------------------------------------|
| N-H                | 3363                                |
| Aliphatic C-H      | 2924                                |
| N=C=O              | 2260                                |
| C=O (urethane)     | 1697                                |
| C=O (urea)         | 1635                                |
| CO-NH              | 1550                                |
| C-O                | 1249                                |
| C-O-C              | 1095                                |

#### 4. FT-IR spectra of polyurethanes extended with 1,2 ethylene glycol (10-12)

##### FT-IR spectrum of polyurethane 10

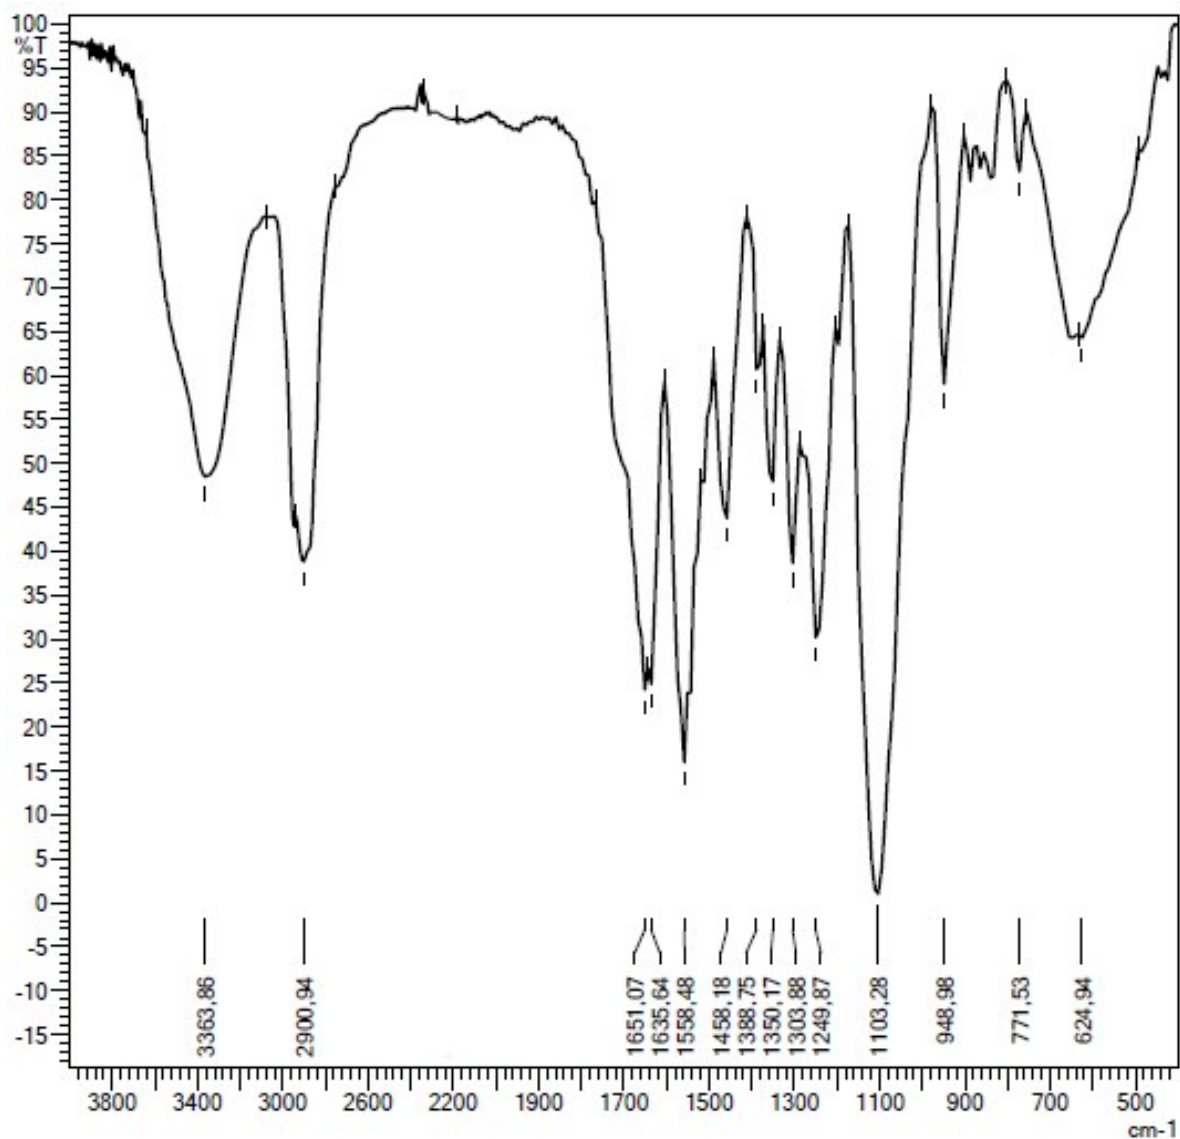

| Group (stretching) | Absorption peak (cm <sup>-1</sup> ) |
|--------------------|-------------------------------------|
| N-H                | 3363                                |
| Aliphatic C-H      | 2900                                |
| N=C=O              | 2260                                |
| C=O (urethane)     | 1651                                |
| C=O (urea)         | 1635                                |
| CO-NH              | 1558                                |
| C-O                | 1249                                |
| C-O-C              | 1103                                |

### FT-IR spectrum of polyurethane 11

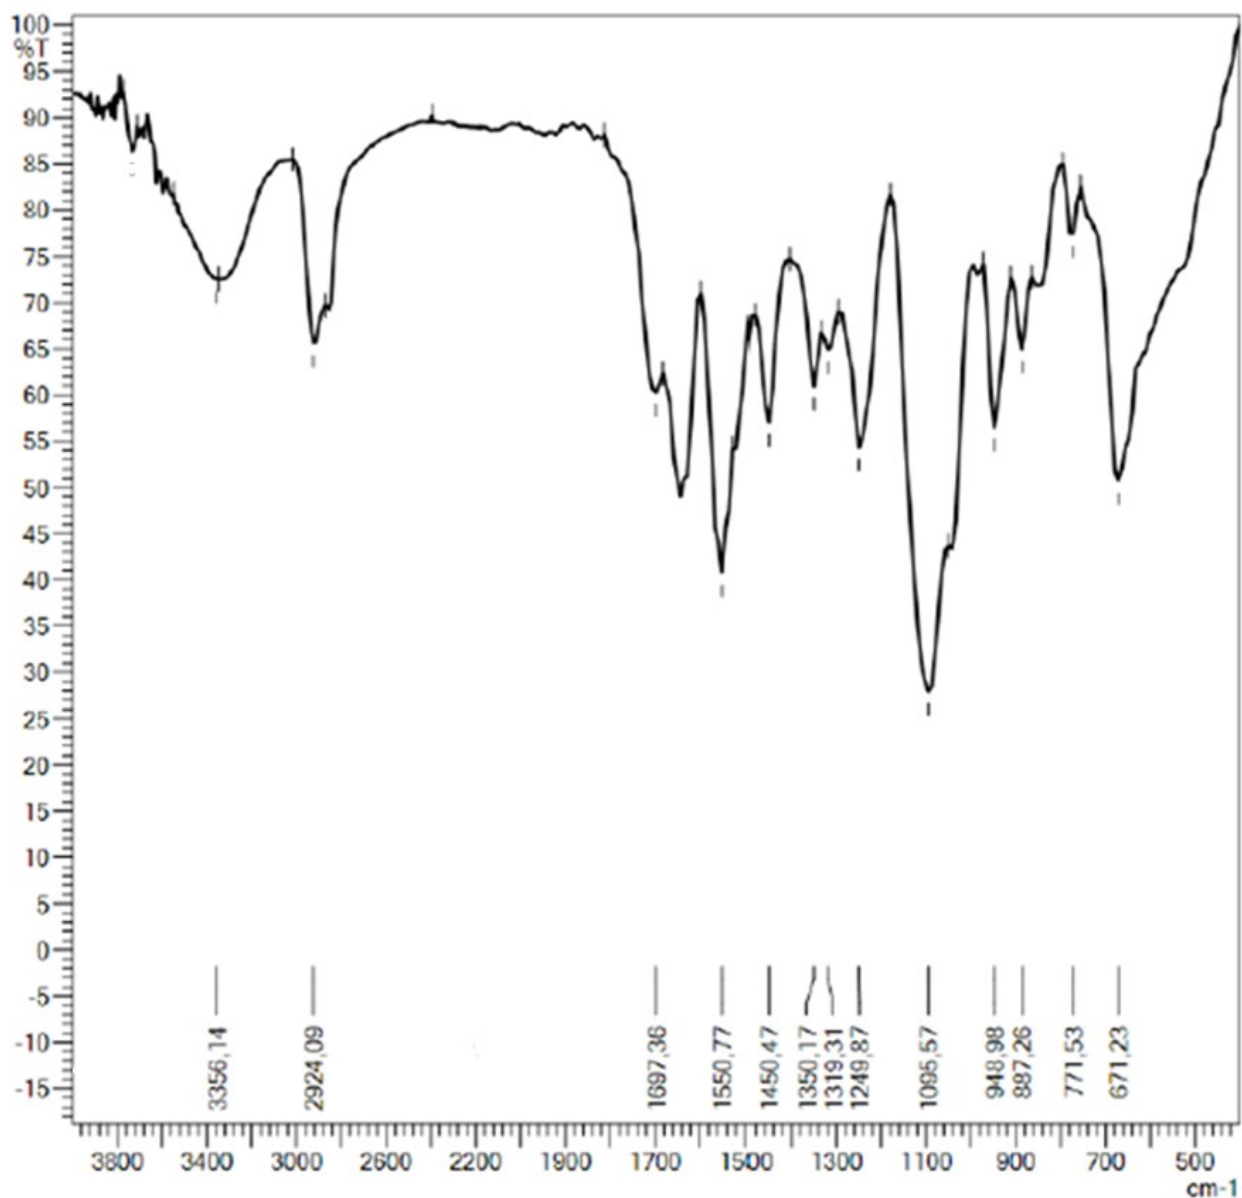

| Group (stretching) | Absorption peak (cm <sup>-1</sup> ) |
|--------------------|-------------------------------------|
| N-H                | 3356                                |
| Aliphatic C-H      | 2924                                |
| C=O (urethane)     | 1697                                |
| C=O (urea)         | 1635                                |
| CO-NH              | 1550                                |
| C-O                | 1249                                |
| C-O-C              | 1095                                |

## FT-IR spectrum of polyurethane 12

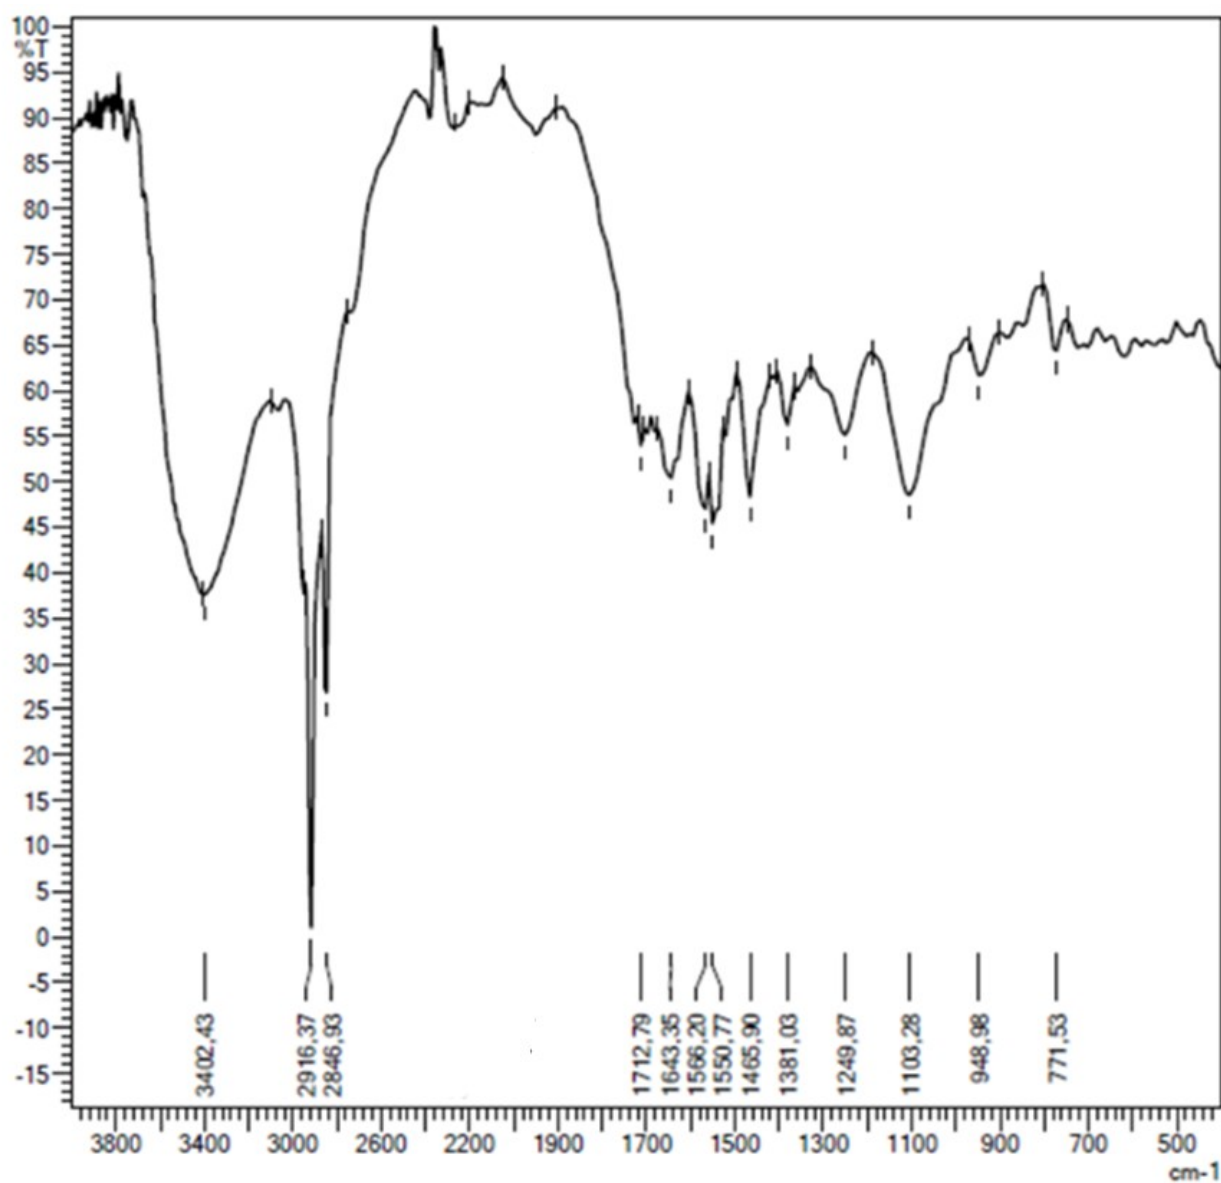

| Group (stretching) | Absorption peak (cm <sup>-1</sup> ) |
|--------------------|-------------------------------------|
| N-H                | 3402                                |
| Aliphatic C-H      | 2846-2916                           |
| C=O (urethane)     | 1712                                |
| C=O (urea)         | 1643                                |
| CO-NH              | 1550                                |
| C-O                | 1249                                |
| C-O-C              | 1103                                |

## 5. FT-IR spectra of polyurethanes extended with 1,4 butanediol (13-15)

### FT-IR spectrum of polyurethane 13

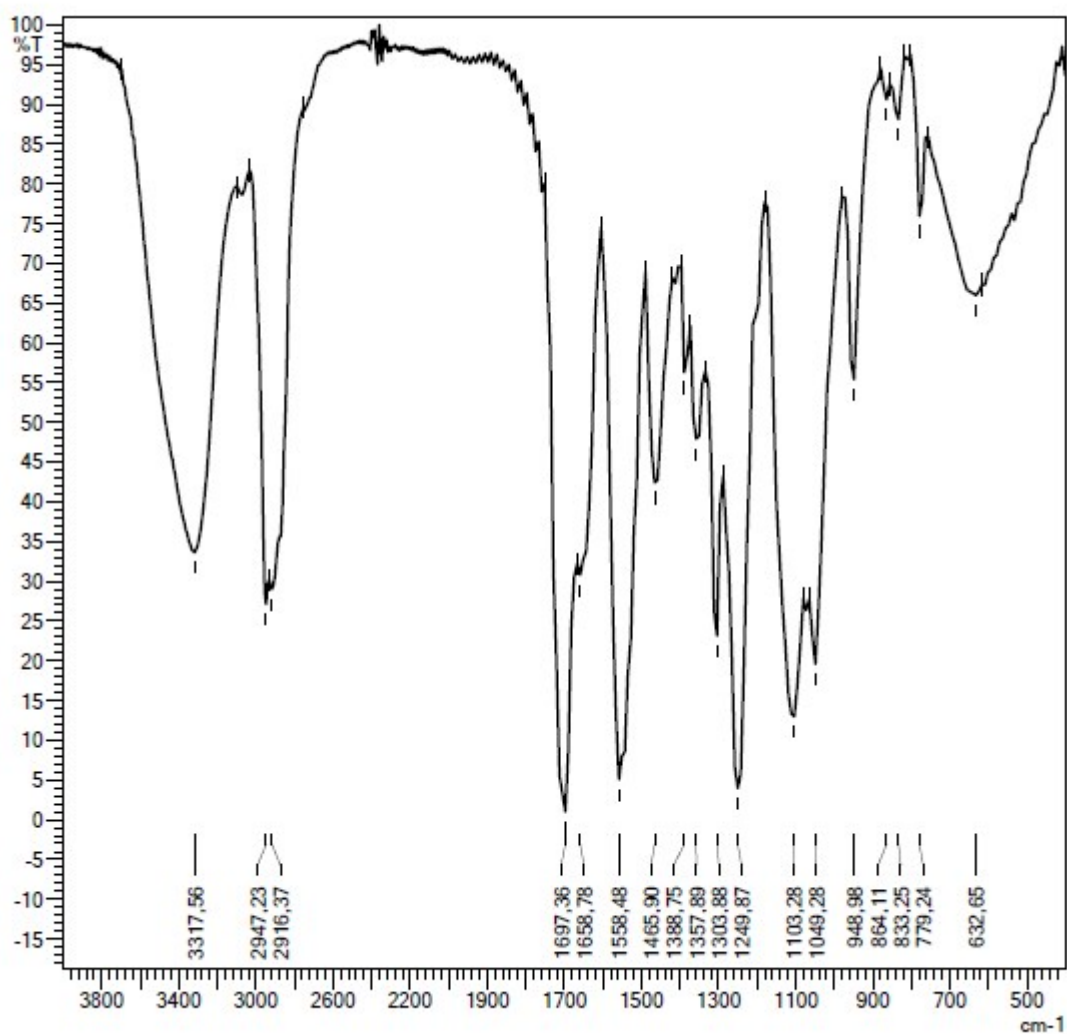

| Group (stretching) | Absorption peak (cm <sup>-1</sup> ) |
|--------------------|-------------------------------------|
| N-H                | 3317                                |
| Aliphatic C-H      | 2916-2947                           |
| C=O (urethane)     | 1697                                |
| C=O (urea)         | 1658                                |
| CO-NH              | 1558                                |
| C-O                | 1249                                |
| C-O-C              | 1049-1103                           |

### FT-IR spectrum of polyurethane 14

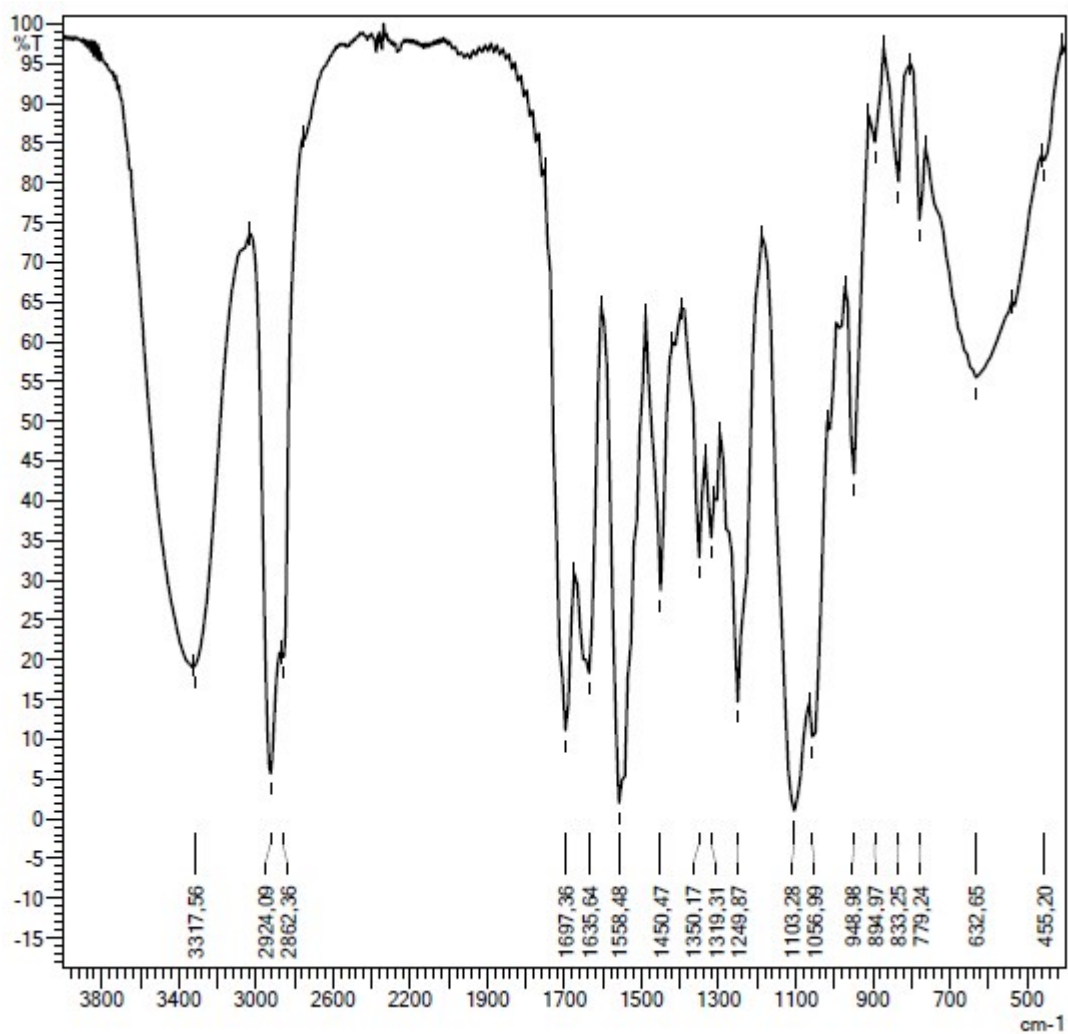

| Group (stretching) | Absorption peak (cm <sup>-1</sup> ) |
|--------------------|-------------------------------------|
| N-H                | 3317                                |
| Aliphatic C-H      | 2862-2924                           |
| C=O (urethane)     | 1697                                |
| C=O (urea)         | 1635                                |
| CO-NH              | 1558                                |
| C-O                | 1249                                |
| C-O-C              | 1056-1103                           |



## FT-IR spectrum of polyurethane 15

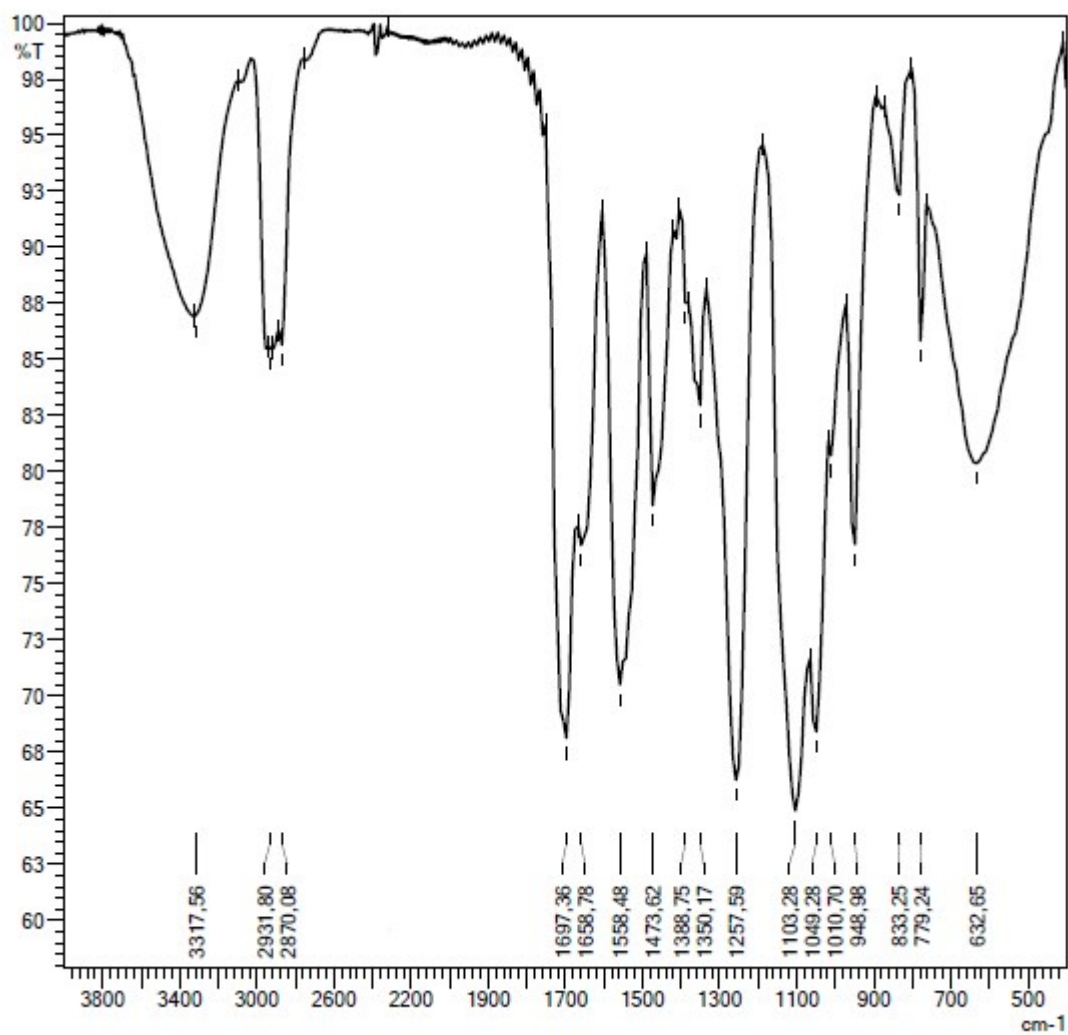

| Group (stretching) | Absorption peak (cm <sup>-1</sup> ) |
|--------------------|-------------------------------------|
| N-H                | 3317                                |
| Aliphatic C-H      | 2870-2931                           |
| C=O (urethane)     | 1697                                |
| C=O (urea)         | 1658                                |
| CO-NH              | 1558                                |
| C-O                | 1257                                |
| C-O-C              | 1049-1103                           |
